# Supplementary material for: Prognosis of Stage I Endometrial Cancer According to the FIGO 2023 Classification Taking into Account Molecular Changes
Source: MDPI journal article supplement (doi:10.3390/cancers16020390), 2024-01-17
Supplement: s1 [file s1]

Table S1. Primer nucleotide sequences used to amplify *POLE* exons 9-14.

| Primer Name | Primer Sequence        |
|-------------|------------------------|
| 9_F         | gttcagggaggcctaattggg  |
| 9_R         | actaacagtggggcagatgc   |
| 10_F        | gctttgcagcctgacttg     |
| 10_R        | ccacatgtccgttcttcca    |
| 11_1F       | gcttctgaactttgggagagga |
| 11_R        | aacgccctccctcaaag      |
| 12_F        | ggaggaatggagaaaggggc   |
| 12_R        | gaggccttcagatctcgctc   |
| 13_F        | tctgtgtggtgcccagtttt   |
| 13_R        | ctccgtggccatctggatg    |
| 14_F        | ctgtgccggtctccttactg   |
| 14_R        | ctccattcagctccagtgca   |
